# Supplementary material for: Design, synthesis, biological evaluation, and molecular dynamics study of asymmetric N-isopropyl-4-piperidone diarylpentanoids as potential anticancer and anti-inflammatory agents
Source: Royal Society of Chemistry journal article supplement (doi:10.1039/d6ra02446g), 2026-05-01

# **Design, Synthesis, Biological Evaluation, and Molecular Dynamics Study of Asymmetric N-Isopropyl-4-piperidone Diarylpentanoids as Potential Anticancer and Anti- Inflammatory Agents**

Huy-Khoa Tran<sup>1,2</sup>, Truc-Vy Mai<sup>1,2</sup>, Van-Dung Le<sup>1,2</sup>, Tran Nguyen Minh An<sup>3</sup>, Dinh-Tri Mai<sup>1,2</sup>, Quoc-Tuan Tran<sup>4</sup>, Thi-Quyen Vu<sup>5</sup>, Thanh-Danh Nguyen<sup>1,2</sup>; Chi-Hien Dang<sup>1,2\*</sup>

<sup>1</sup>Institute of Advanced Technology, Vietnam Academy of Science and Technology, 1B, TL29 An Phu Dong Ward, Ho Chi Minh City, Vietnam.

<sup>2</sup>Graduate University of Science and Technology, Vietnam Academy of Science and Technology, 18 Hoang Quoc Viet, Nghia Do Ward, Hanoi 11000, Viet Nam.

<sup>3</sup>Faculty of Chemical Engineering (FCE), Industrial University of Ho Chi Minh City (IUH), Ho Chi Minh City, Vietnam.

<sup>4</sup>Department of Biochemistry, Faculty of Biology-Biotechnology, Ho Chi Minh University of Science, Ho Chi Minh City, Vietnam

<sup>5</sup>Faculty of Applied Technology, Van Lang School of Technology, Van Lang University, Ho Chi Minh City, Vietnam

\*Corresponding author: [dangchihien@gmail.com](mailto:dangchihien@gmail.com)

## Supplementary Data

|                                                                                                                                                                      |  |
|----------------------------------------------------------------------------------------------------------------------------------------------------------------------|--|
| <b>Table S1.</b> Structure, synthetic yield of MACs.....                                                                                                             |  |
| <b>Table S2.</b> Comprehensive comparison of molecular docking, 200 ns molecular dynamics (MD) simulation, and pharmacokinetic properties of the lead compounds..... |  |
| <b>Table S3.</b> Binding free energy of ligand–receptor complexes calculated using the MM/GBSA method .....                                                          |  |
| <b>Fig S1.</b> <sup>1</sup> H NMR Spectrum of compound KD2a.....                                                                                                     |  |
| <b>Fig S2.</b> <sup>13</sup> C NMR Spectrum of compound KD2a.....                                                                                                    |  |
| <b>Fig S3.</b> HR-MS spectrum of compound KD2a .....                                                                                                                 |  |
| <b>Fig S4.</b> <sup>1</sup> H NMR Spectrum of compound KD2b.....                                                                                                     |  |
| <b>Fig S5.</b> <sup>13</sup> C NMR Spectrum of compound KD2b .....                                                                                                   |  |
| <b>Fig S6.</b> HR-MS Spectrum of compound KD2b .....                                                                                                                 |  |
| <b>Fig S7.</b> <sup>1</sup> H NMR Spectrum of compound KD2c.....                                                                                                     |  |
| <b>Fig S8.</b> <sup>13</sup> C NMR Spectrum of compound KD2c.....                                                                                                    |  |
| <b>Fig S9.</b> HR-MS spectrum of compound KD2c .....                                                                                                                 |  |
| <b>Fig S10.</b> <sup>1</sup> H NMR Spectrum of compound KD2d.....                                                                                                    |  |
| <b>Fig S11.</b> <sup>13</sup> C NMR Spectrum of compound KD2d .....                                                                                                  |  |
| <b>Fig S12.</b> HR-MS spectrum of compound KD2d.....                                                                                                                 |  |
| <b>Fig S13.</b> <sup>1</sup> H NMR Spectrum of compound KD2e.....                                                                                                    |  |
| <b>Fig S14.</b> <sup>13</sup> C NMR Spectrum of compound KD2e.....                                                                                                   |  |
| <b>Fig S15.</b> HR-MS Spectrum of compound KD2e .....                                                                                                                |  |
| <b>Fig S16.</b> <sup>1</sup> H NMR Spectrum of compound KD2f.....                                                                                                    |  |
| <b>Fig S17.</b> <sup>13</sup> C NMR Spectrum of compound KD2f.....                                                                                                   |  |
| <b>Fig S18.</b> HR-MS spectrum of compound KD2f.....                                                                                                                 |  |
| <b>Fig S19.</b> <sup>1</sup> H NMR Spectrum of compound KD2g.....                                                                                                    |  |
| <b>Fig S20.</b> <sup>13</sup> C NMR Spectrum of compound KD2g .....                                                                                                  |  |
| <b>Fig S21.</b> HR-MS spectrum of compound KD2g.....                                                                                                                 |  |
| <b>Fig S22.</b> <sup>1</sup> H NMR Spectrum of compound KD2h.....                                                                                                    |  |
| <b>Fig S23.</b> <sup>13</sup> C NMR Spectrum of compound KD2h .....                                                                                                  |  |

|                 |                                               |       |
|-----------------|-----------------------------------------------|-------|
| <b>Fig S24.</b> | HR-MS spectrum of compound KD2h               | ..... |
| <b>Fig S25.</b> | $^1\text{H}$ NMR Spectrum of compound KD2i    | ..... |
| <b>Fig S26.</b> | $^{13}\text{C}$ NMR Spectrum of compound KD2i | ..... |
| <b>Fig S27.</b> | HR-MS spectrum of compound KD2i               | ..... |
| <b>Fig S28.</b> | $^1\text{H}$ NMR Spectrum of compound KB2a    | ..... |
| <b>Fig S29.</b> | $^{13}\text{C}$ NMR Spectrum of compound KB2a | ..... |
| <b>Fig S30.</b> | HR-MS spectrum of compound KB2a               | ..... |
| <b>Fig S31.</b> | $^1\text{H}$ NMR Spectrum of compound KB2b    | ..... |
| <b>Fig S32.</b> | $^{13}\text{C}$ NMR Spectrum of compound KB2b | ..... |
| <b>Fig S33.</b> | HR-MS spectrum of compound KB2b               | ..... |
| <b>Fig S37.</b> | $^1\text{H}$ NMR Spectrum of compound KB2c    | ..... |
| <b>Fig S38.</b> | $^{13}\text{C}$ NMR Spectrum of compound KB2c | ..... |
| <b>Fig S39.</b> | HR-MS spectrum of compound KB2c               | ..... |
| <b>Fig S40.</b> | $^1\text{H}$ NMR Spectrum of compound KB2d    | ..... |
| <b>Fig S41.</b> | $^{13}\text{C}$ Spectrum of compound KB2d     | ..... |
| <b>Fig S42.</b> | HR-MS spectrum of compound KB2d               | ..... |

**Table S1.** Structure, synthetic yield of MACs

| Comp. | Structures                                                                          | Yield (%) | Color                        |
|-------|-------------------------------------------------------------------------------------|-----------|------------------------------|
| KD2a  | 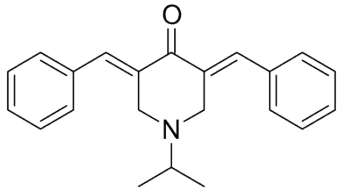   | 95.6      | Yellow powder                |
| KD2b  |    | 94.2      | Yellow powder                |
| KD2c  |    | 94.1      | Yellow powder                |
| KD2d  |    | 92.8      | Yellow powder                |
| KD2e  |   | 92.7      | Yellow powder                |
| KD2f  |  | 93.4      | Yellow powder                |
| KD2g  |  | 94.3      | Red powder<br>(New compound) |
| KD2h  |  | 95.1      | Yellow powder                |

|             |                                                                                    |        |                                        |
|-------------|------------------------------------------------------------------------------------|--------|----------------------------------------|
| <b>KD2i</b> | 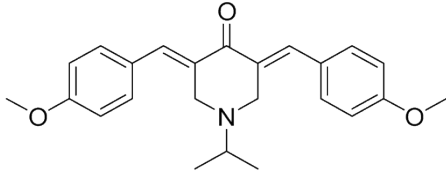  | 94.8 % | Yellow powder                          |
| <b>KB2a</b> |   | 54.3%  | Yellow powder<br><b>(New compound)</b> |
| <b>KB2b</b> |   | 54.6%  | Yellow powder<br><b>(New compound)</b> |
| <b>KB2c</b> |   | 56.3%  | Yellow powder<br><b>(New compound)</b> |
| <b>KB2d</b> |  | 56.7%  | Yellow powder<br><b>(New compound)</b> |

---

**Table S2.** Comprehensive comparison of molecular docking, 200 ns molecular dynamics (MD) simulation, and pharmacokinetic properties of the lead compounds.

| Property / Evaluation parameter                                                 | KB2c                          | KB2d                       |
|---------------------------------------------------------------------------------|-------------------------------|----------------------------|
| <b>1. Molecular Docking (static state)</b>                                      |                               |                            |
| Binding energy $\Delta G$ (kcal mol <sup>-1</sup> )                             | -10.78                        | -10.96                     |
| Inhibition constant Ki                                                          | 12.49 nM                      | 9.18 nM                    |
| <b>2. Molecular Dynamics simulation (200 ns)</b>                                |                               |                            |
| Average ligand RMSD (RMSD_lig)                                                  | ~0.65 nm (pose drifting)      | ~0.20 nm (highly stable)   |
| Hydrogen-bond network (H-bonds)                                                 | Unstable and intermittent     | Continuously maintained    |
| MM-PBSA total binding energy $\Delta G_{\text{bind}}$ (kcal mol <sup>-1</sup> ) | -29.53                        | -33.53                     |
| van der Waals energy (VDWAALS)                                                  | -45.51                        | -52.17                     |
| Electrostatic energy (EEL)                                                      | 9.53                          | -25.02                     |
| <b>3. Pharmacochemical properties and ADMET</b>                                 |                               |                            |
| GI absorption                                                                   | High                          | High                       |
| Blood–brain barrier permeation (BBB permeant)                                   | Yes                           | No                         |
| Lipinski rule violations                                                        | 0                             | 0                          |
| Water solubility (ESOL LogS)                                                    | Moderately soluble (-5.48)    | Moderately soluble (-4.96) |
| <b>4. Overall evaluation</b>                                                    |                               |                            |
| Practical development conclusion                                                | Low potential (loose binding) | Optimal lead compound      |

**Table S3.** Binding free energy of ligand–receptor complexes calculated using the MM/GBSA method

| Comp. | Target        | VDWAALS | EEL    | EGB   | ESURF | GGAS   | GSOLV | TOTAL  |
|-------|---------------|---------|--------|-------|-------|--------|-------|--------|
| KB2d  | MCF-7         | -52.17  | -25.02 | 50.22 | -6.55 | -77.2  | 43.67 | -33.53 |
| KB2c  | NO inhibition | -45.51  | 9.53   | 12.42 | -5.97 | -35.98 | 6.46  | -29.53 |

**Fig S1.**  $^1\text{H}$  NMR Spectrum of compound KD2a

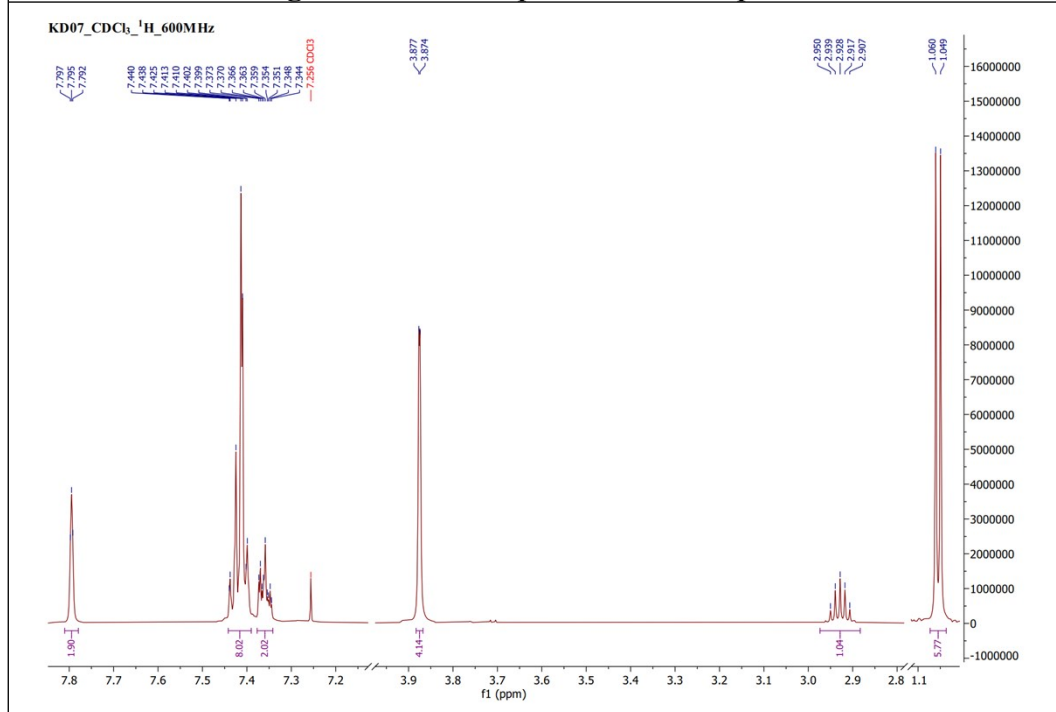

**Fig S2.**  $^{13}\text{C}$  NMR Spectrum of compound KD2a

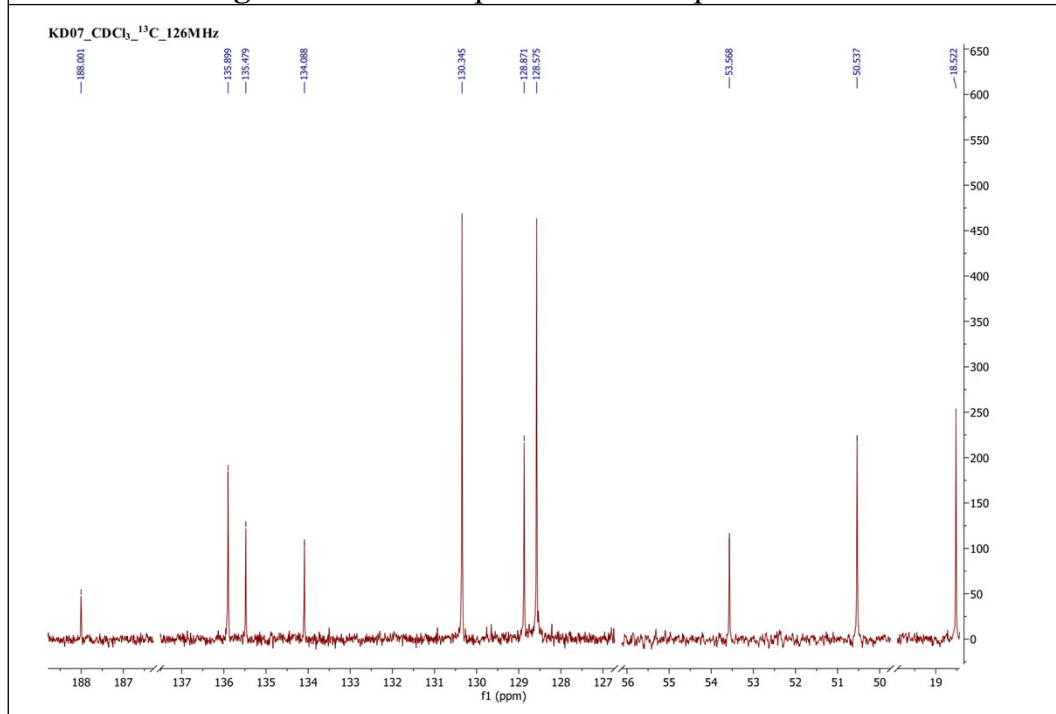

### Fig S3. HR-MS spectrum of compound KD2a

#### Full mass spectrum

Spectrum from KH0A\_KD07\_(+)ESI 2025-09-25-14-52-33.wiff2 (sample 1) - KH0A\_KD07\_(+)E... 0.148 min, noise filtered (noise multiplier = 1.5), Gaussian smoothed (0.5 points)

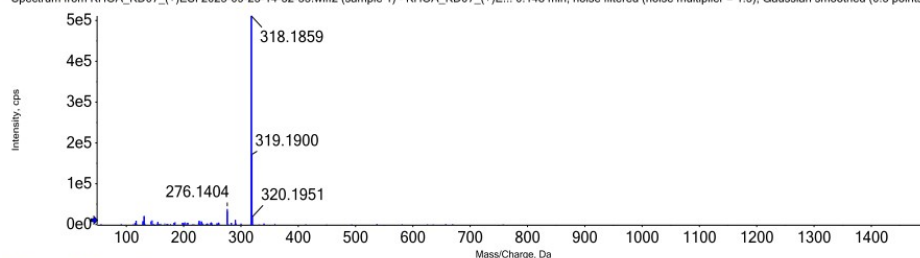

#### Expanded spectrum

Spectrum from KH0A\_KD07\_(+)ESI 2025-09-25-14-52-33.wiff2 (sample 1) - KH0A\_KD07\_(+)E... 0.148 min, noise filtered (noise multiplier = 1.5), Gaussian smoothed (0.5 points)

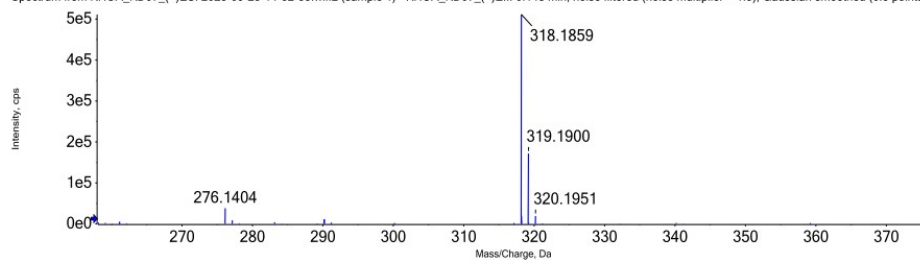

### Fig S4. <sup>1</sup>H NMR Spectrum of compound KD2b

KD05\_CDCl<sub>3</sub>-<sup>1</sup>H\_600MHz

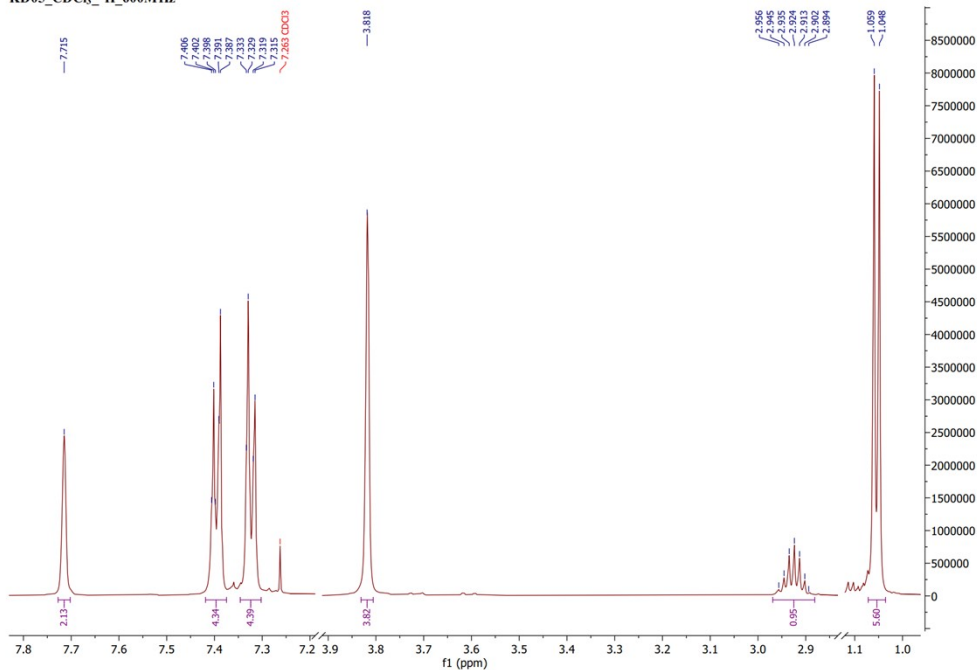

**Fig S5.**  $^{13}\text{C}$  NMR Spectrum of compound KD2b

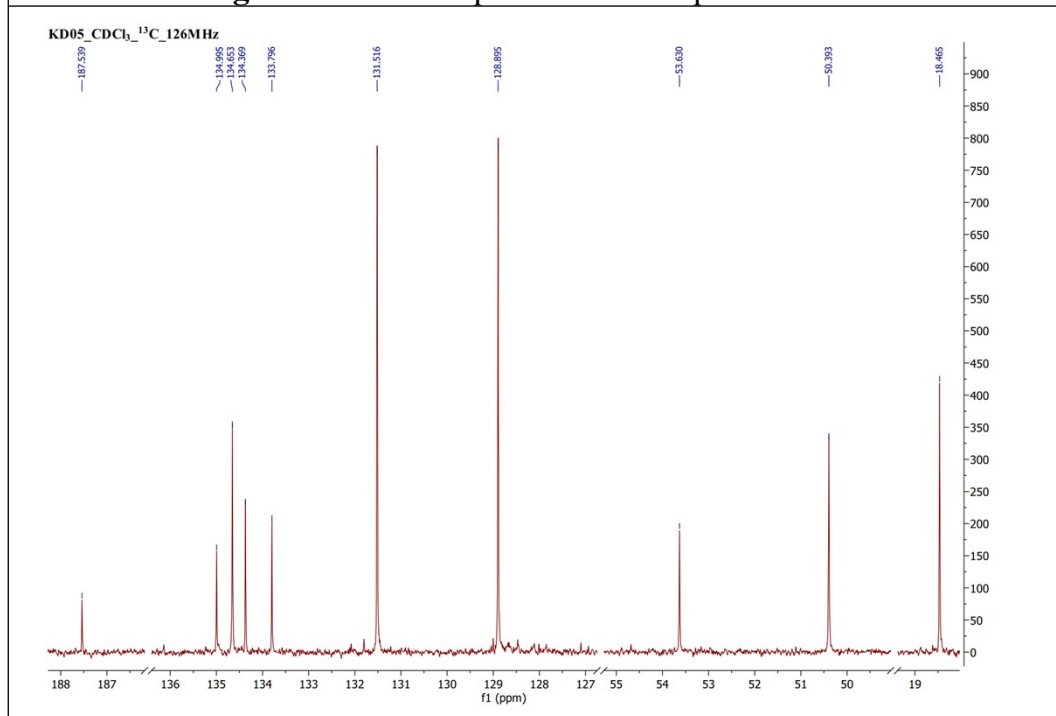

**Fig S6.** HR-MS Spectrum of compound KD2b

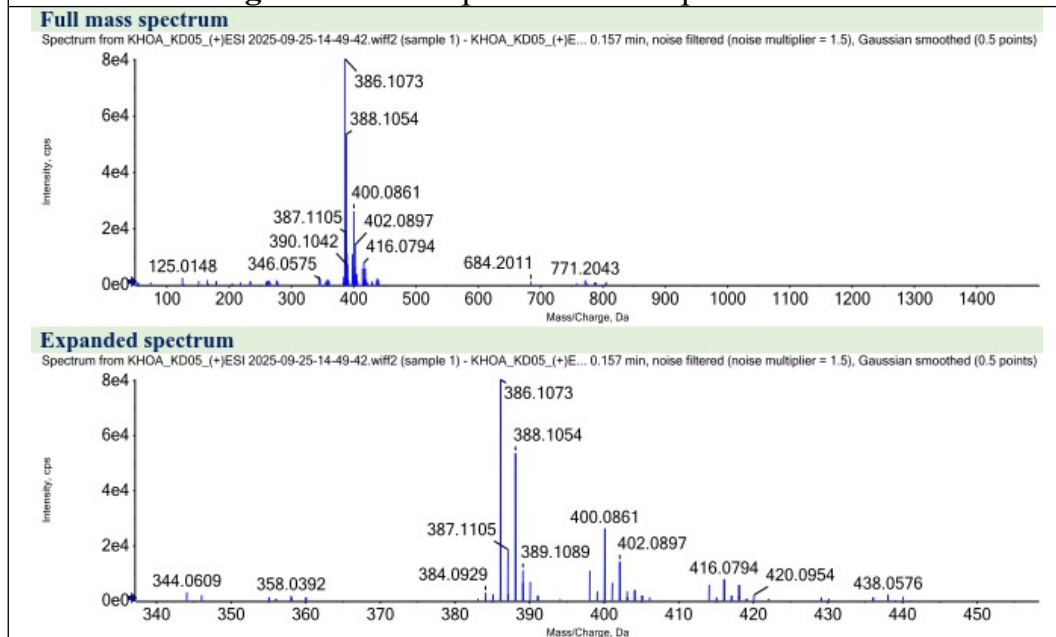

**Fig S7.**  $^1\text{H}$  NMR Spectrum of compound KD2c

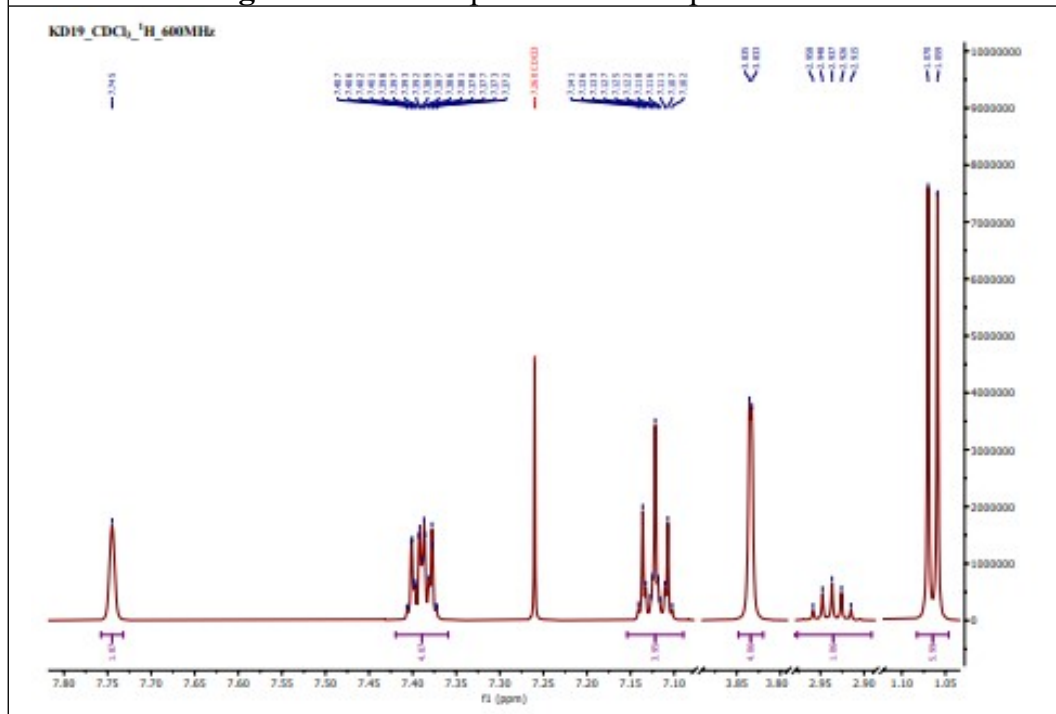

**Fig S8.**  $^{13}\text{C}$  NMR Spectrum of compound KD2c

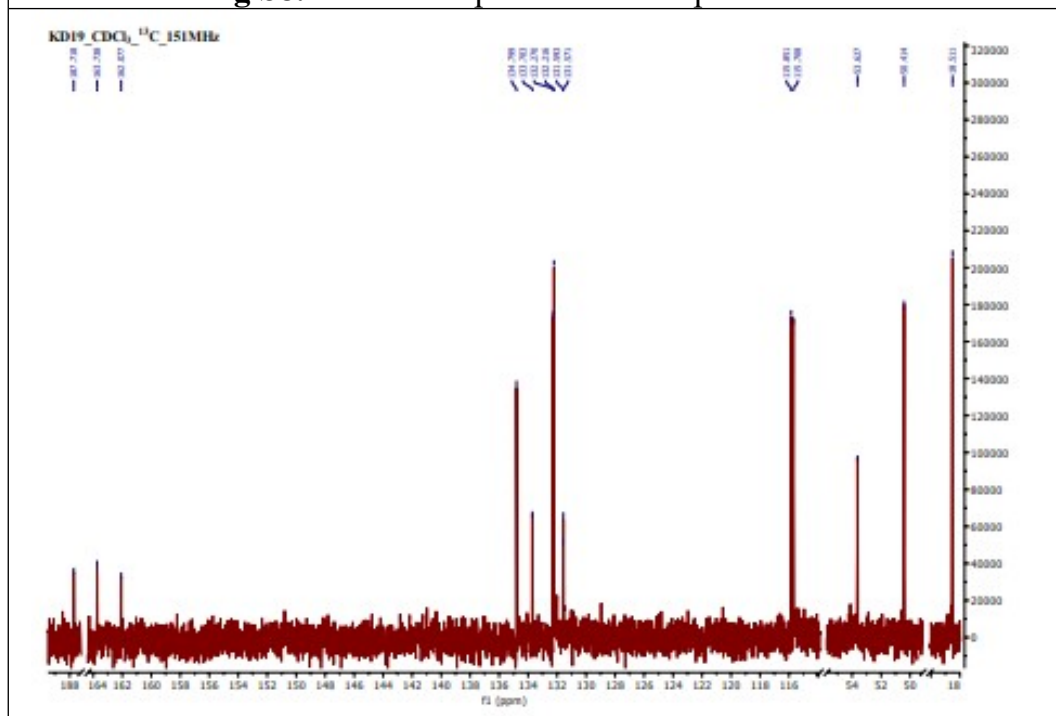

**Fig S9. HR-MS spectrum of compound KD2c**

**Full mass spectrum**

Spectrum from KHOA\_KD19\_(+)ESI 2025-09-25-15-09-32.wiff2 (sample 1) - KHOA\_KD19\_(+)E... 0.148 min, noise filtered (noise multiplier = 1.5), Gaussian smoothed (0.5 points)

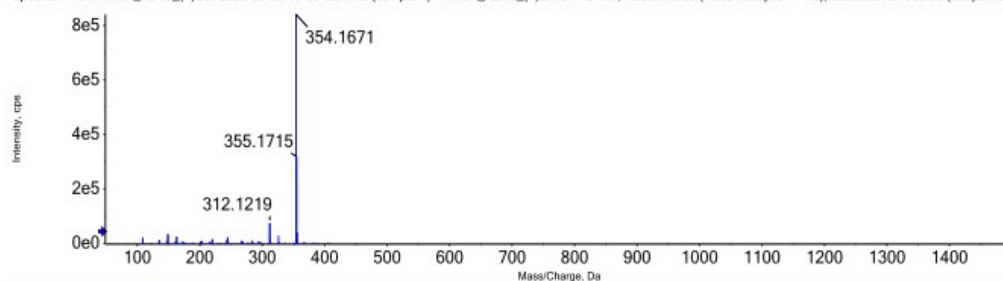

**Expanded spectrum**

Spectrum from KHOA\_KD19\_(+)ESI 2025-09-25-15-09-32.wiff2 (sample 1) - KHOA\_KD19\_(+)E... 0.148 min, noise filtered (noise multiplier = 1.5), Gaussian smoothed (0.5 points)

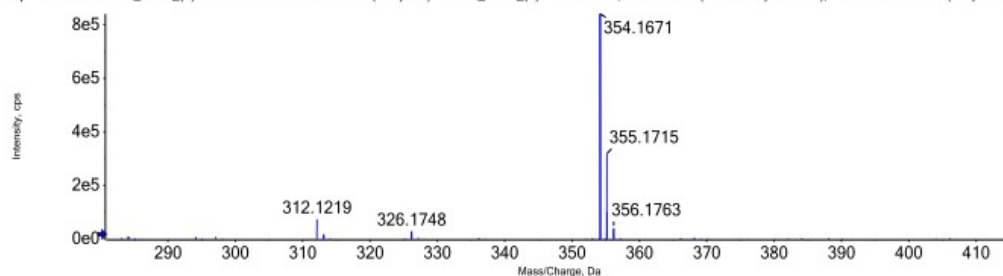

**Fig S10. <sup>1</sup>H NMR Spectrum of compound KD2d**

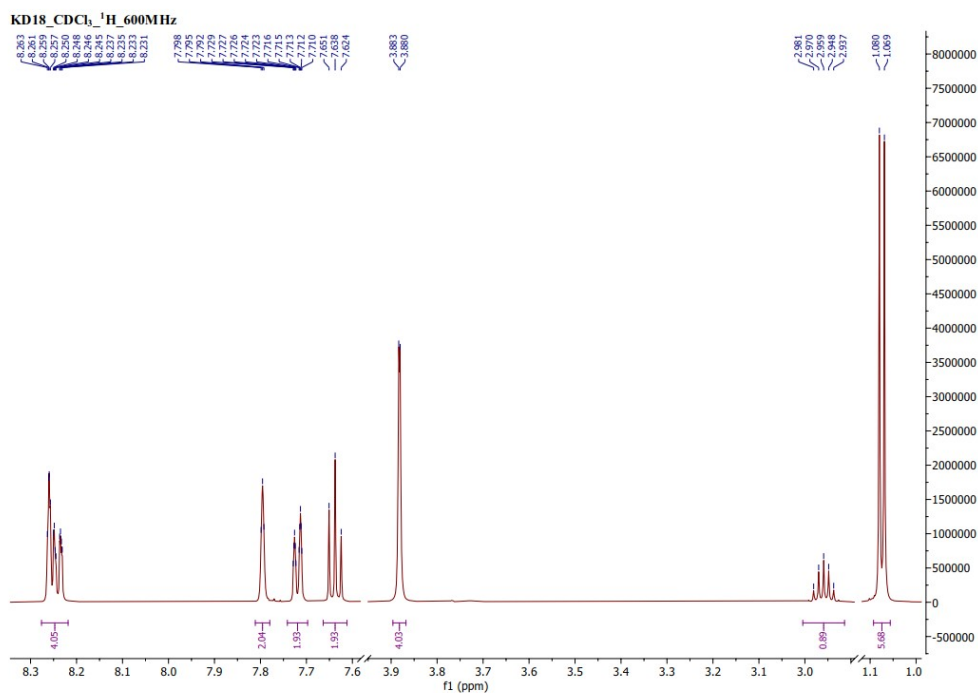

**Fig S11.**  $^{13}\text{C}$  NMR Spectrum of compound KD2d

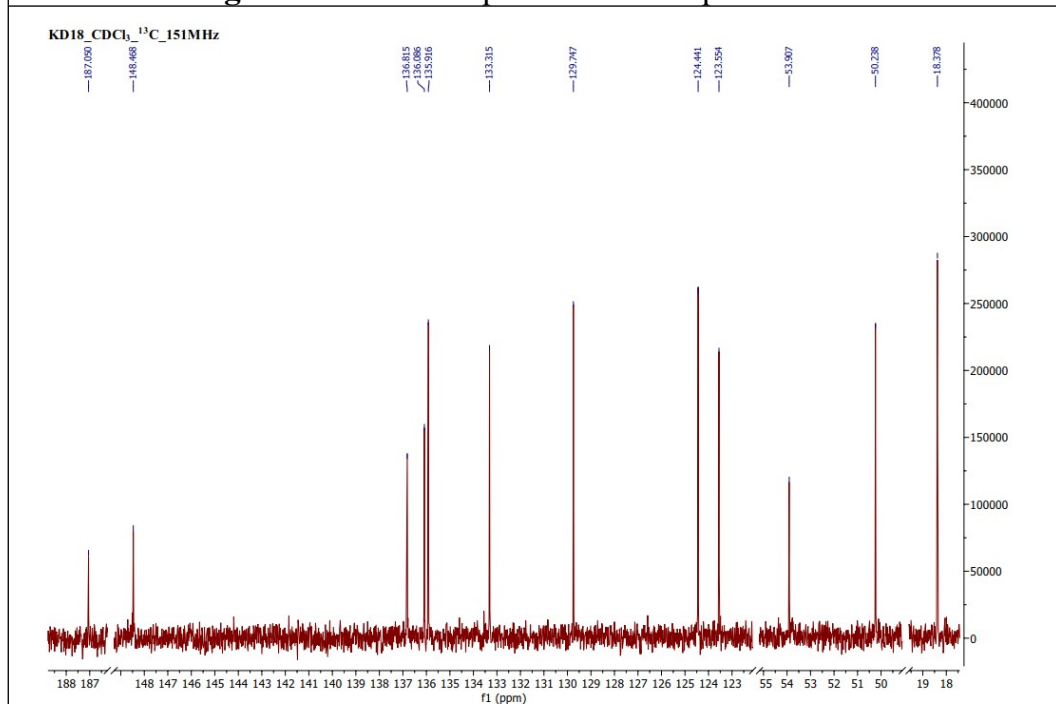

**Fig S12.** HR-MS spectrum of compound KD2d

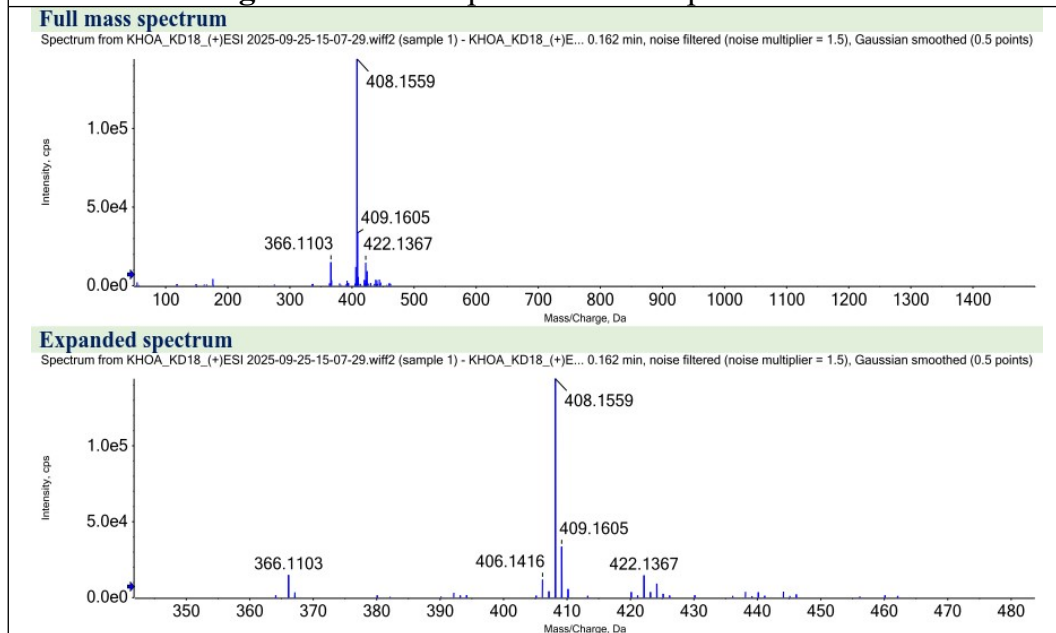

**Fig S13.**  $^1\text{H}$  NMR Spectrum of compound KD2e

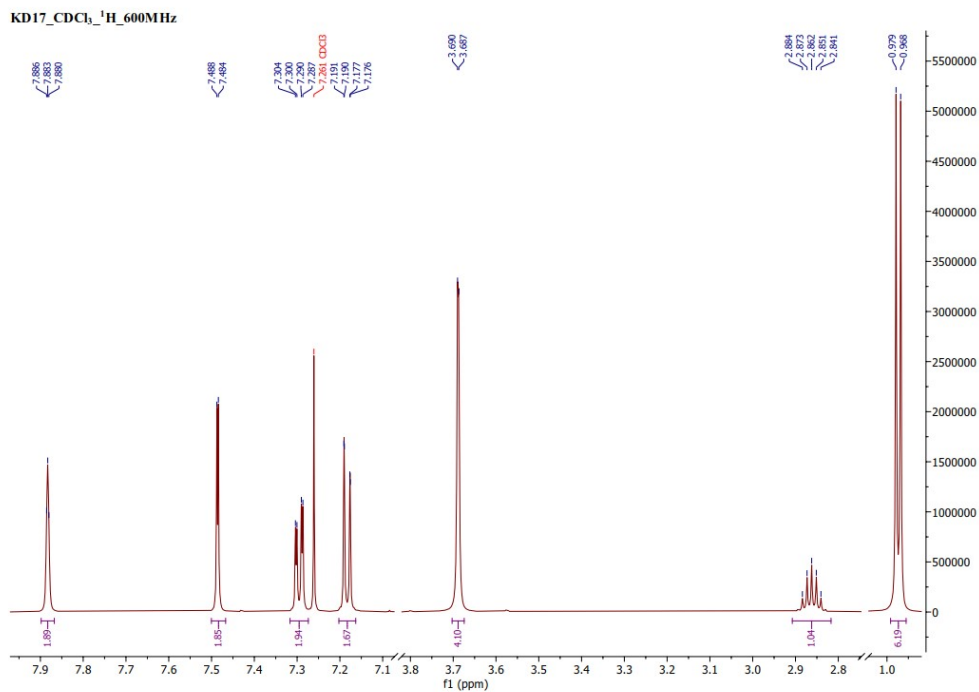

**Fig S14.**  $^{13}\text{C}$  NMR Spectrum of compound KD2e

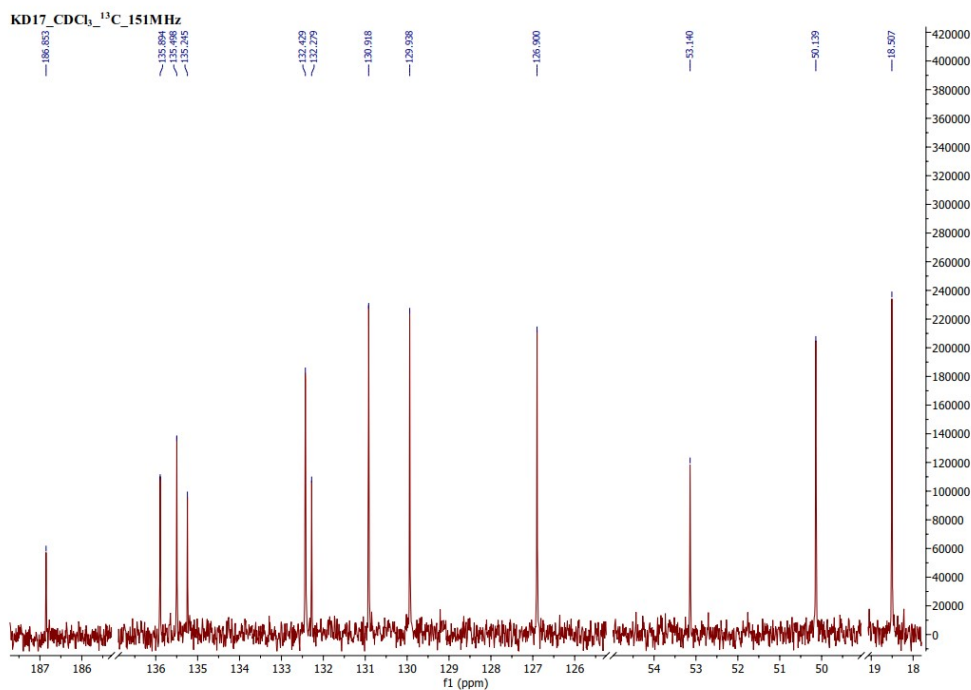

### Fig S15. HR-MS Spectrum of compound KD2e

#### Full mass spectrum

Spectrum from KHOA\_KD17\_(+)ESI 2025-09-25-15-06-05.wiff2 (sample 1) - KHOA\_KD17\_(+)E... 0.139 min, noise filtered (noise multiplier = 1.5), Gaussian smoothed (0.5 points)

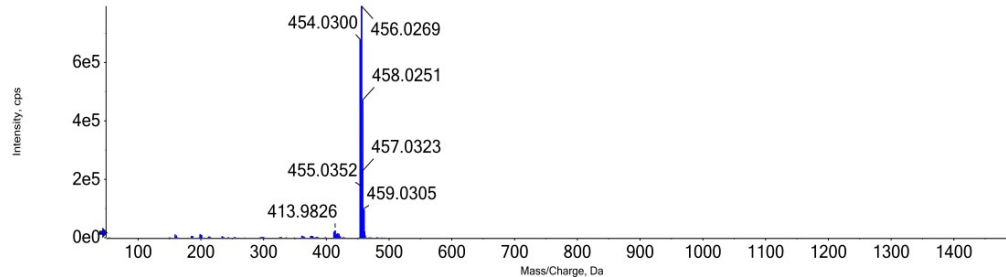

#### Expanded spectrum

Spectrum from KHOA\_KD17\_(+)ESI 2025-09-25-15-06-05.wiff2 (sample 1) - KHOA\_KD17\_(+)E... 0.139 min, noise filtered (noise multiplier = 1.5), Gaussian smoothed (0.5 points)

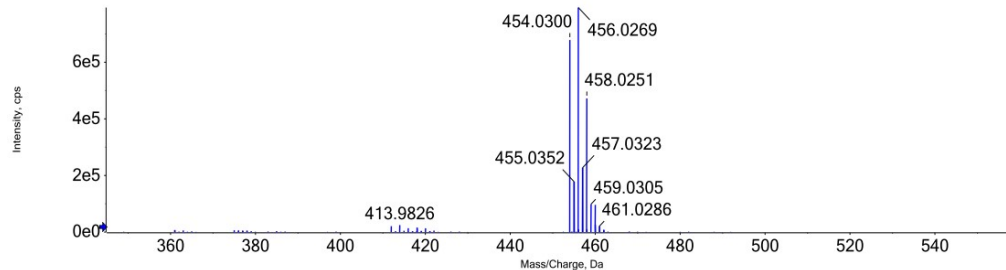

### Fig S16. <sup>1</sup>H NMR Spectrum of compound KD2f

KD06\_CDCl<sub>3</sub>\_1H\_600MHz

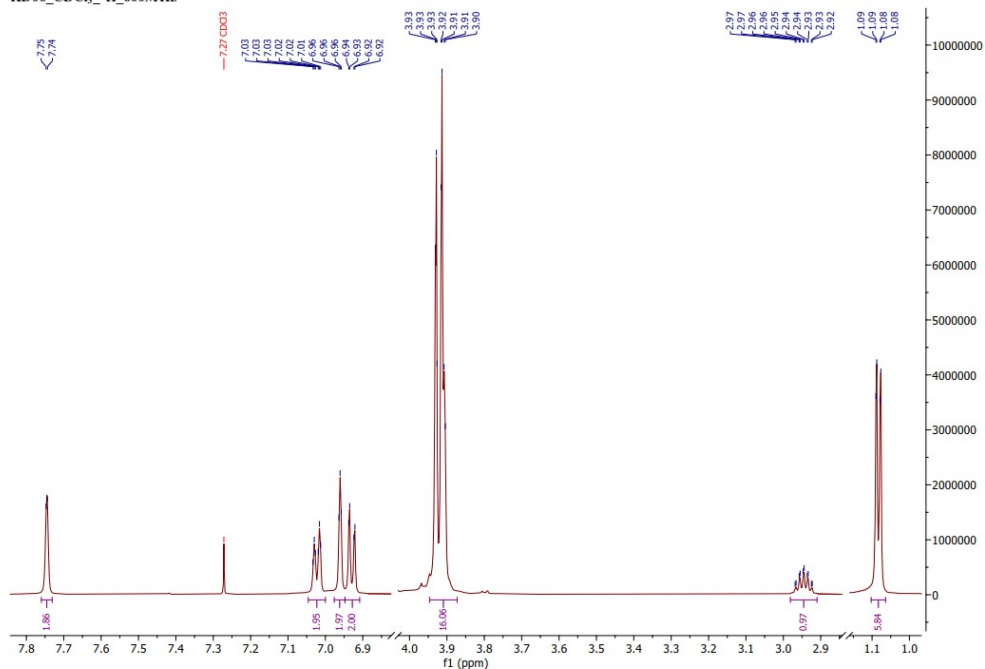

### Fig S17. <sup>13</sup>C NMR Spectrum of compound KD2f

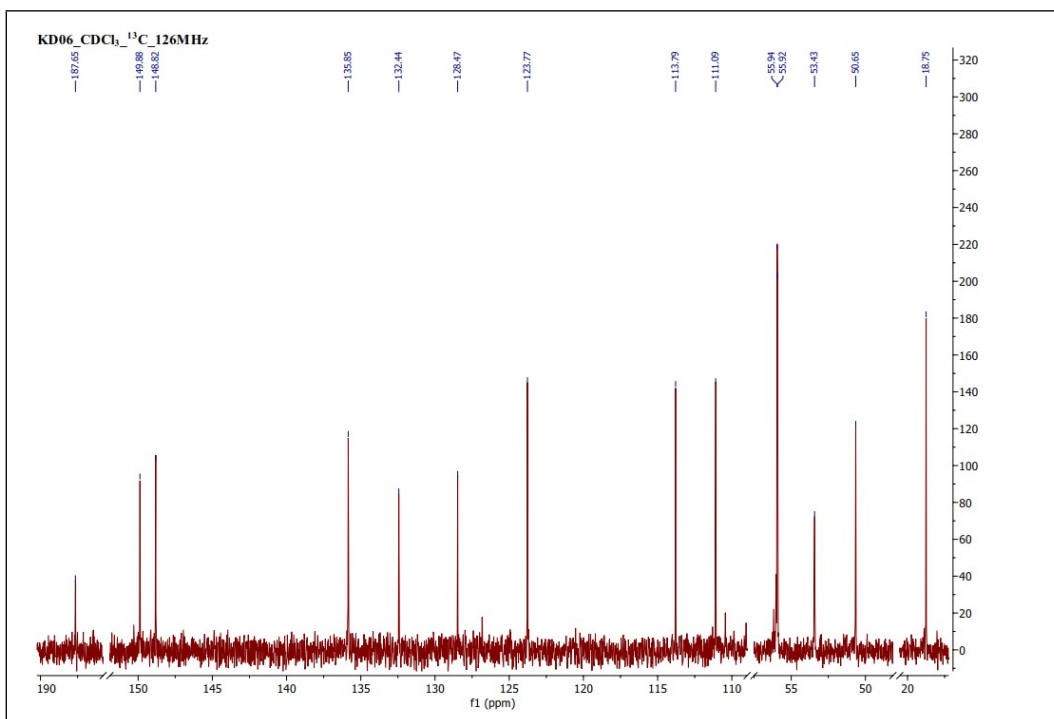

**Fig S18. HR-MS spectrum of compound KD2f**

**Full mass spectrum**

Spectrum from KHOA\_KD06\_(+)ESI 2025-09-25-14-51-02.wiff2 (sample 1) - KHOA\_KD06\_(+)E... 0.143 min, noise filtered (noise multiplier = 1.5), Gaussian smoothed (0.5 points)

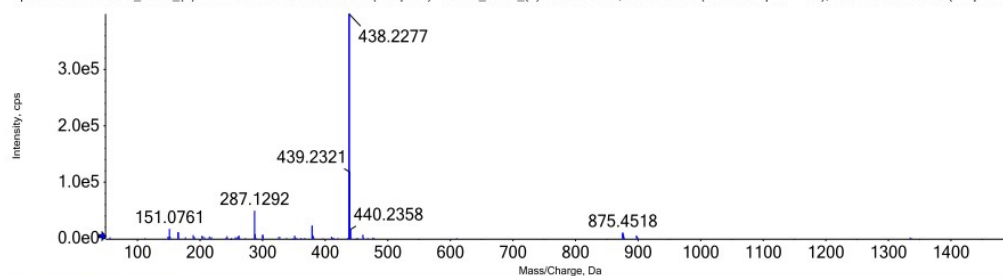

**Expanded spectrum**

Spectrum from KHOA\_KD06\_(+)ESI 2025-09-25-14-51-02.wiff2 (sample 1) - KHOA\_KD06\_(+)E... 0.143 min, noise filtered (noise multiplier = 1.5), Gaussian smoothed (0.5 points)

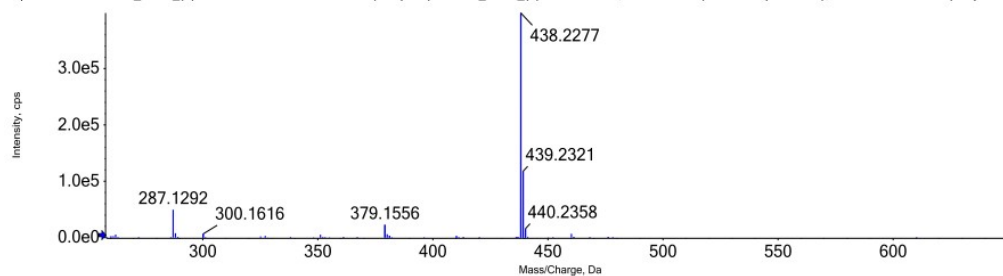

**Fig S19.**  $^1\text{H}$  NMR Spectrum of compound KD2g

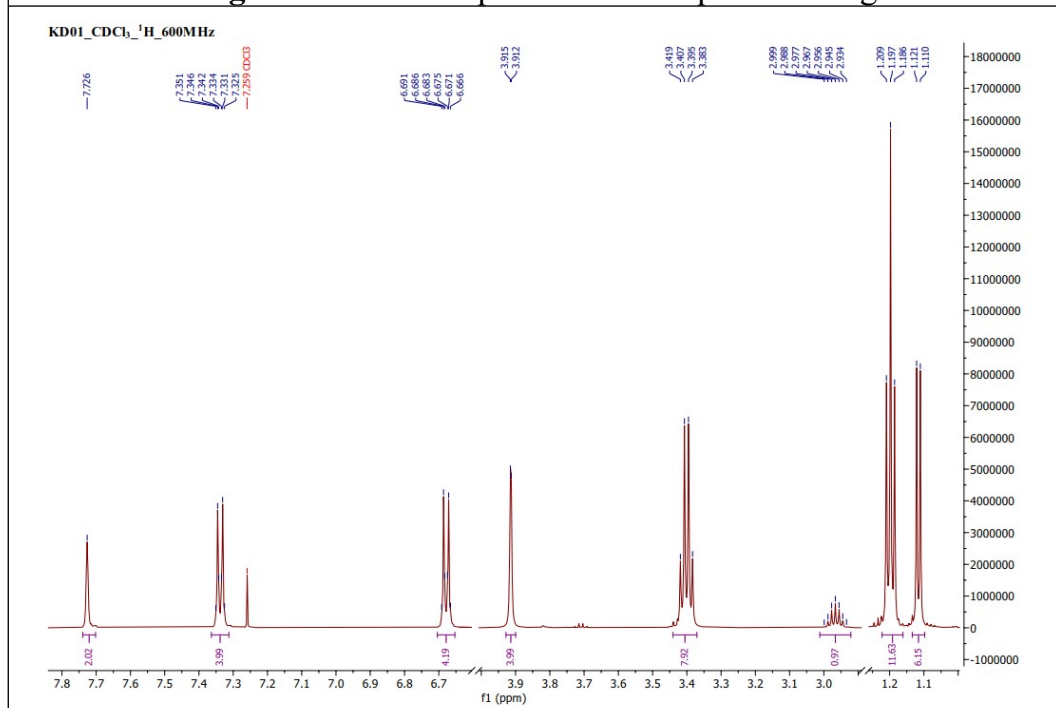

**Fig S20.**  $^{13}\text{C}$  NMR Spectrum of compound KD2g

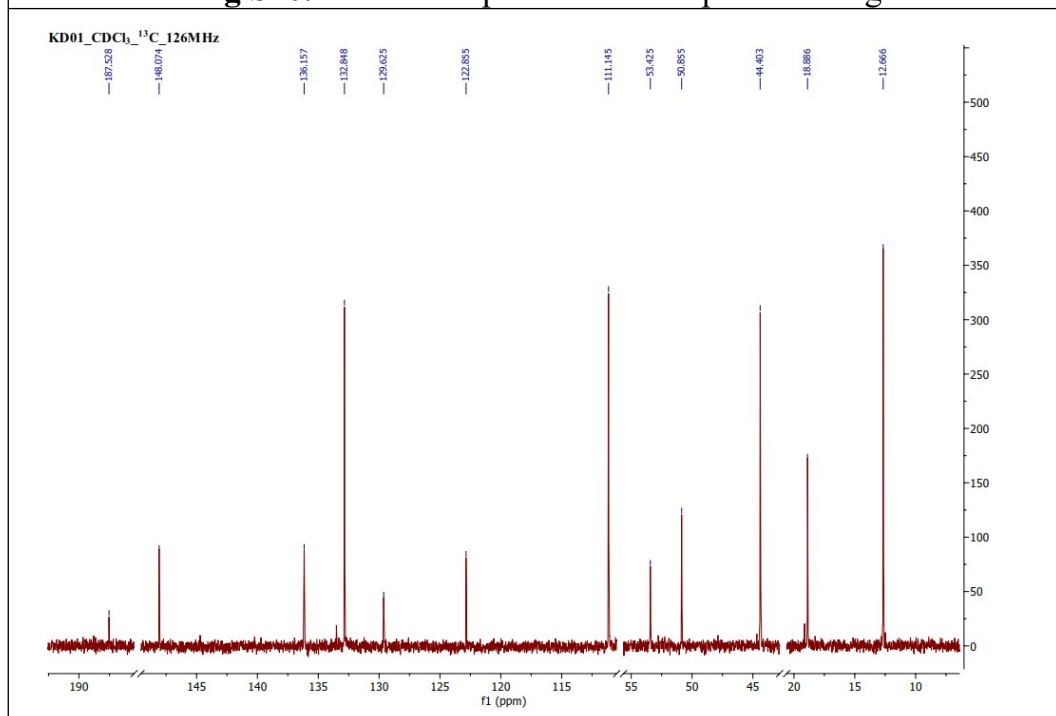

**Fig S21. HR-MS spectrum of compound KD2g**

**Full mass spectrum**

Spectrum from KHOA\_KD01\_(+)ESI 2025-09-25-14-43-43.wiff2 (sample 2) - KHOA\_KD01\_(+)E... 0.143 min, noise filtered (noise multiplier = 1.5), Gaussian smoothed (0.5 points)

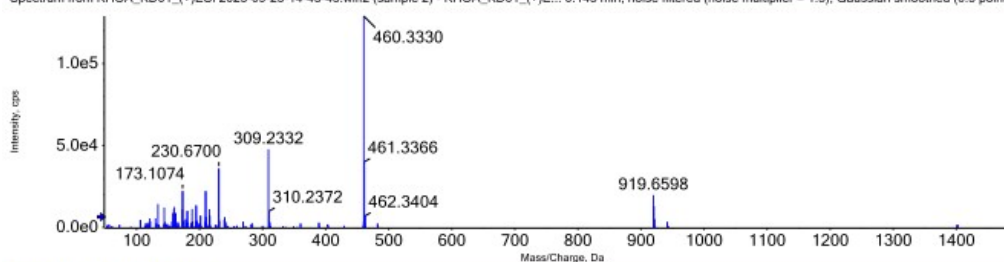

**Expanded spectrum**

Spectrum from KHOA\_KD01\_(+)ESI 2025-09-25-14-43-43.wiff2 (sample 2) - KHOA\_KD01\_(+)E... 0.143 min, noise filtered (noise multiplier = 1.5), Gaussian smoothed (0.5 points)

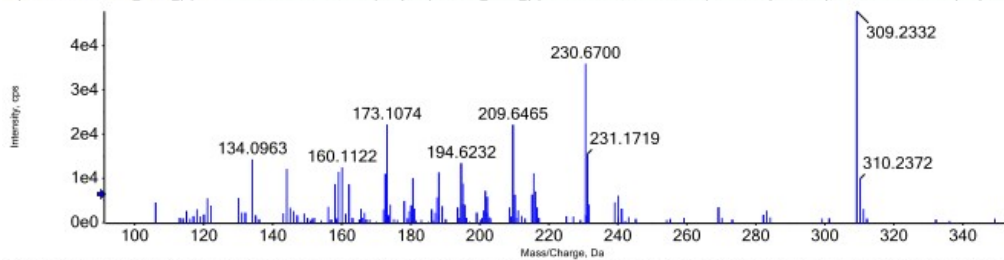

Spectrum from KHOA\_KD01\_(+)ESI 2025-09-25-14-43-43.wiff2 (sample 2) - KHOA\_KD01\_(+)E... 0.143 min, noise filtered (noise multiplier = 1.5), Gaussian smoothed (0.5 points)

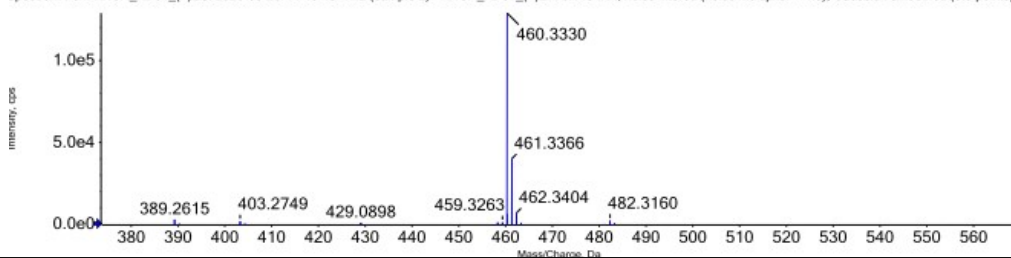

**Fig S22. <sup>1</sup>H NMR Spectrum of compound KD2h**

KD08\_CDCl<sub>3</sub>\_1H\_600MHz

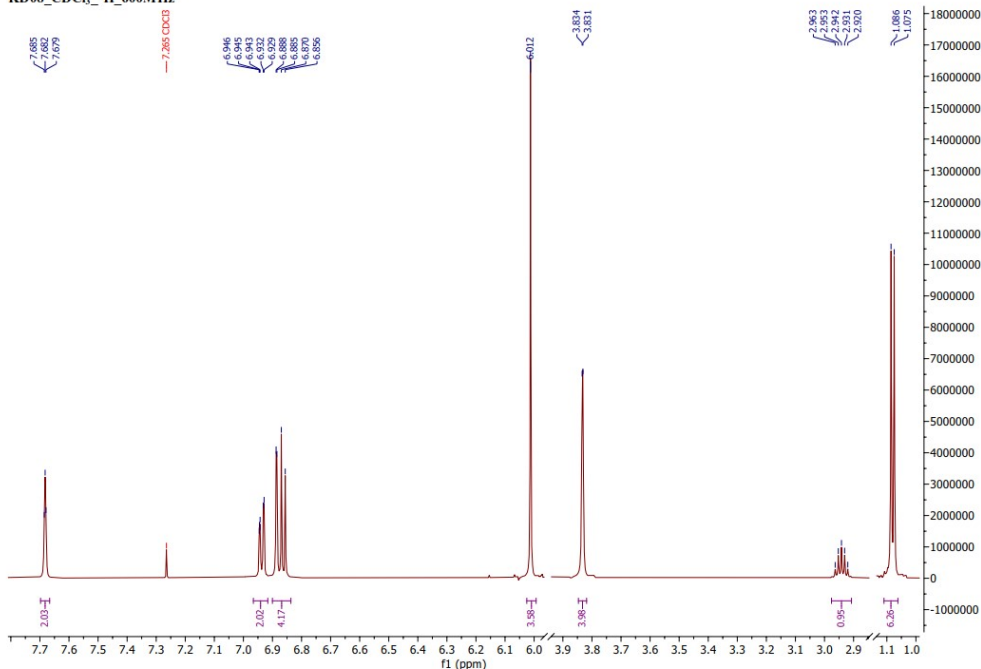

**Fig S23.**  $^{13}\text{C}$  NMR Spectrum of compound KD2h

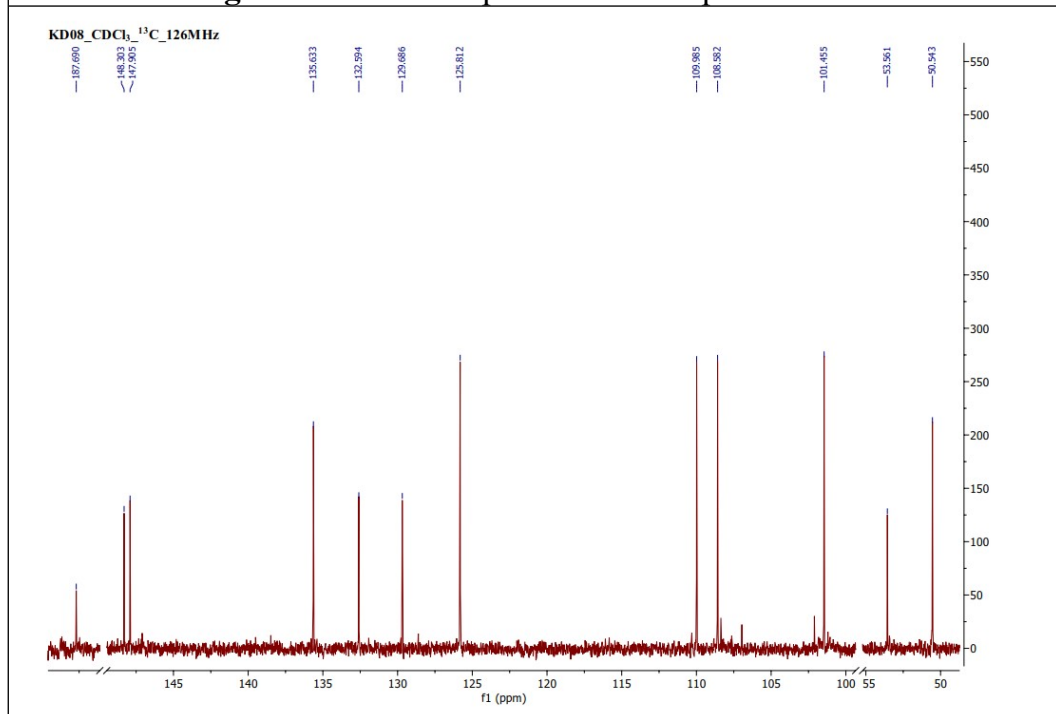

**Fig S24.** HR-MS spectrum of compound KD2h

**Full mass spectrum**

Spectrum from KHOA\_KD08\_(+)ESI 2025-09-25-14-53-59.wiff2 (sample 1) - KHOA\_KD08\_(+)E... 0.153 min, noise filtered (noise multiplier = 1.5), Gaussian smoothed (0.5 points)

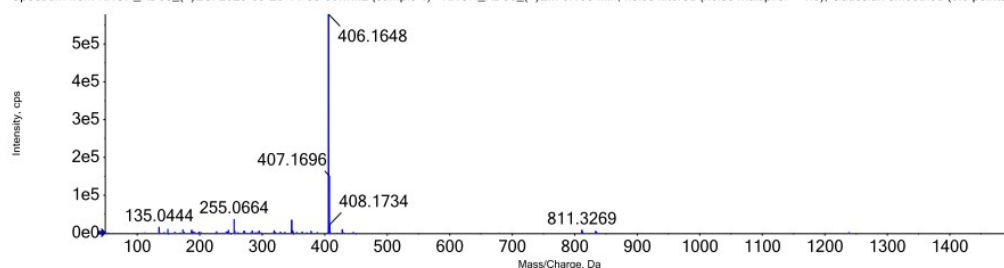

**Expanded spectrum**

Spectrum from KHOA\_KD08\_(+)ESI 2025-09-25-14-53-59.wiff2 (sample 1) - KHOA\_KD08\_(+)E... 0.153 min, noise filtered (noise multiplier = 1.5), Gaussian smoothed (0.5 points)

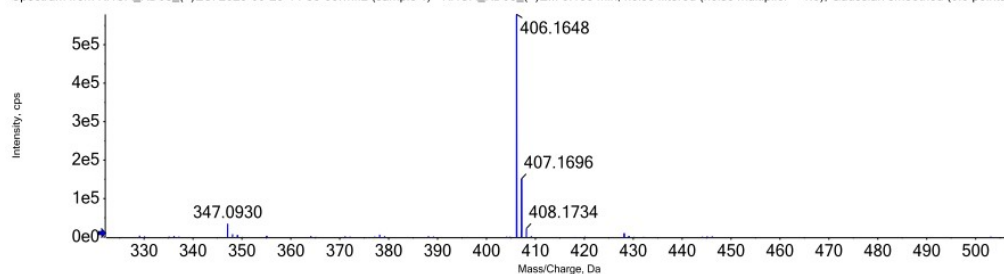

Fig S25. <sup>1</sup>H NMR Spectrum of compound KD2i

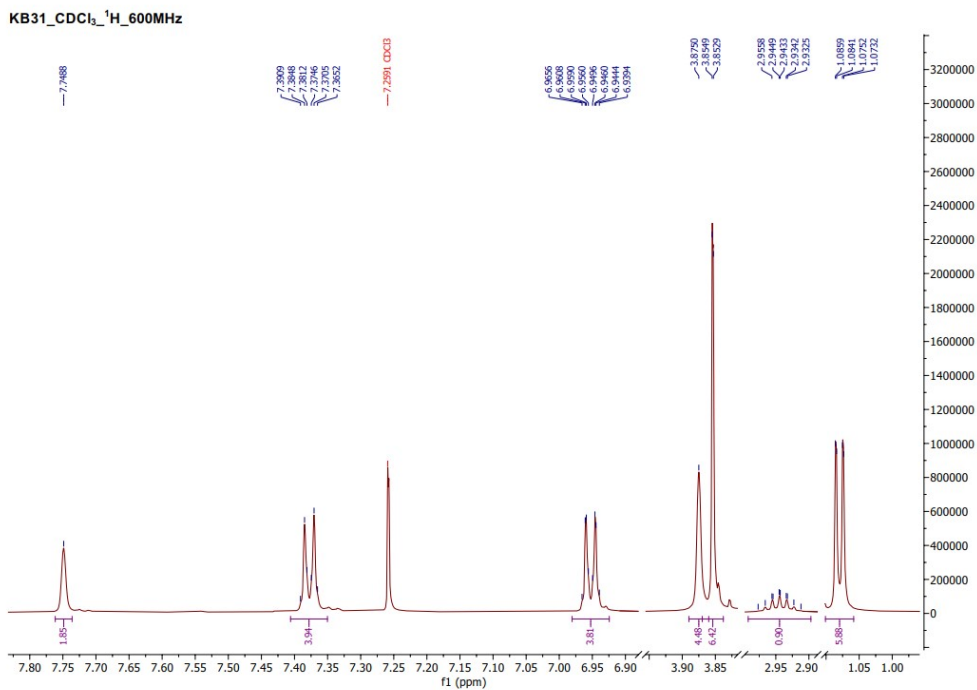

Fig S26. <sup>13</sup>C NMR Spectrum of compound KD2i

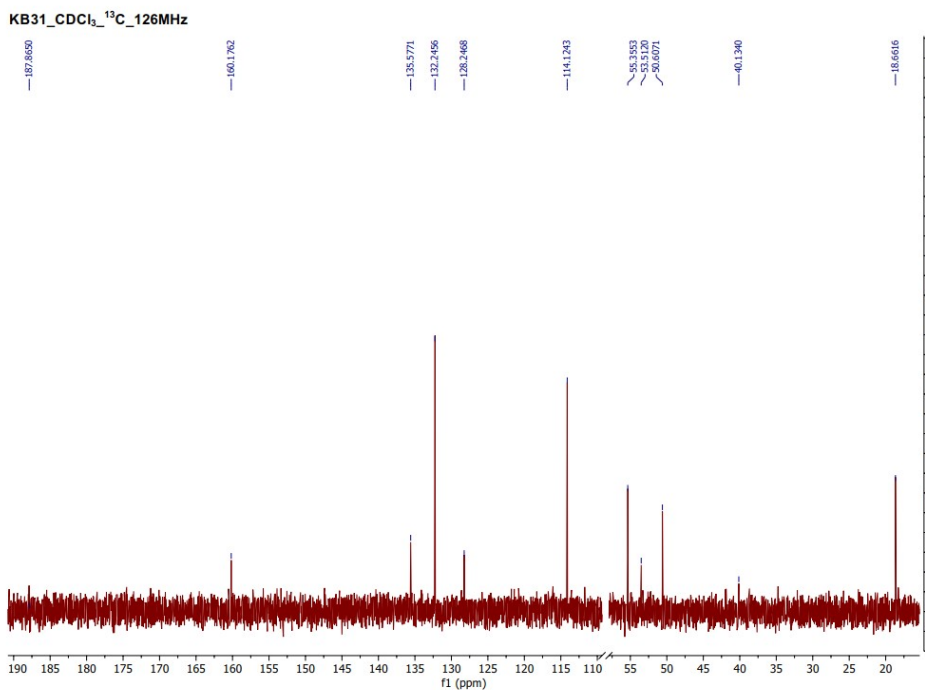

### Fig S27. HR-MS spectrum of compound KD2i

#### Full mass spectrum

Spectrum from KHOA\_KB31\_(+)ESI.wiff2 (sample 1) - KHOA\_KB31\_(+)ESI, +TOF MS (50 - 15... 0.171 min, noise filtered (noise multiplier = 1.5), Gaussian smoothed (0.5 points))

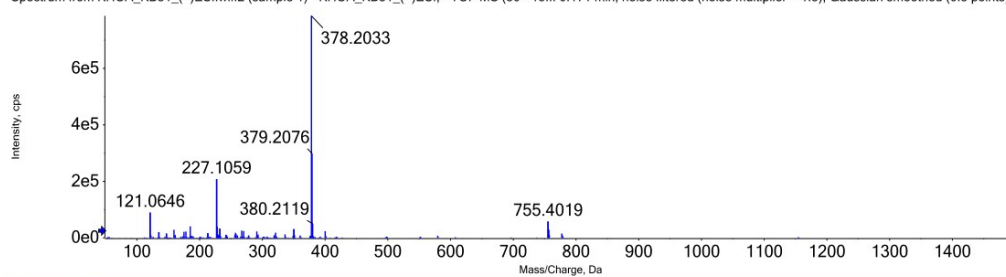

#### Expanded spectrum

Spectrum from KHOA\_KB31\_(+)ESI.wiff2 (sample 1) - KHOA\_KB31\_(+)ESI, +TOF MS (50 - 15... 0.171 min, noise filtered (noise multiplier = 1.5), Gaussian smoothed (0.5 points))

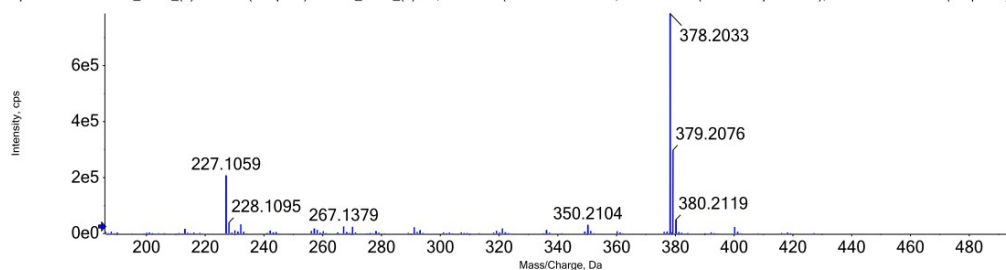

### Fig S28. <sup>1</sup>H NMR Spectrum of compound KB2a

KB29\_CDCl<sub>3</sub>\_1H\_600MHz

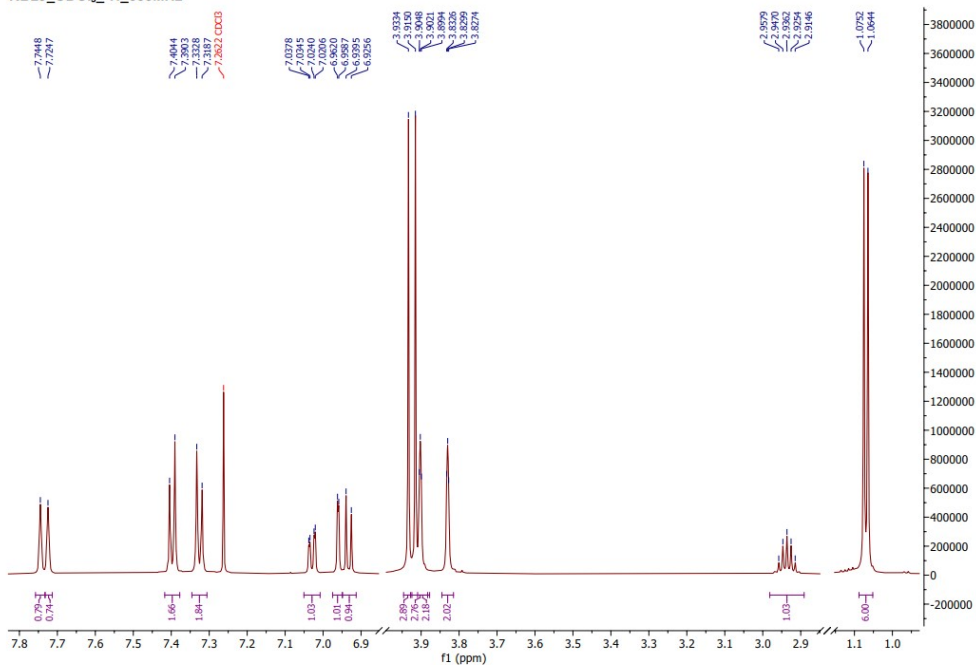

**Fig S29.**  $^{13}\text{C}$  NMR Spectrum of compound KB2a

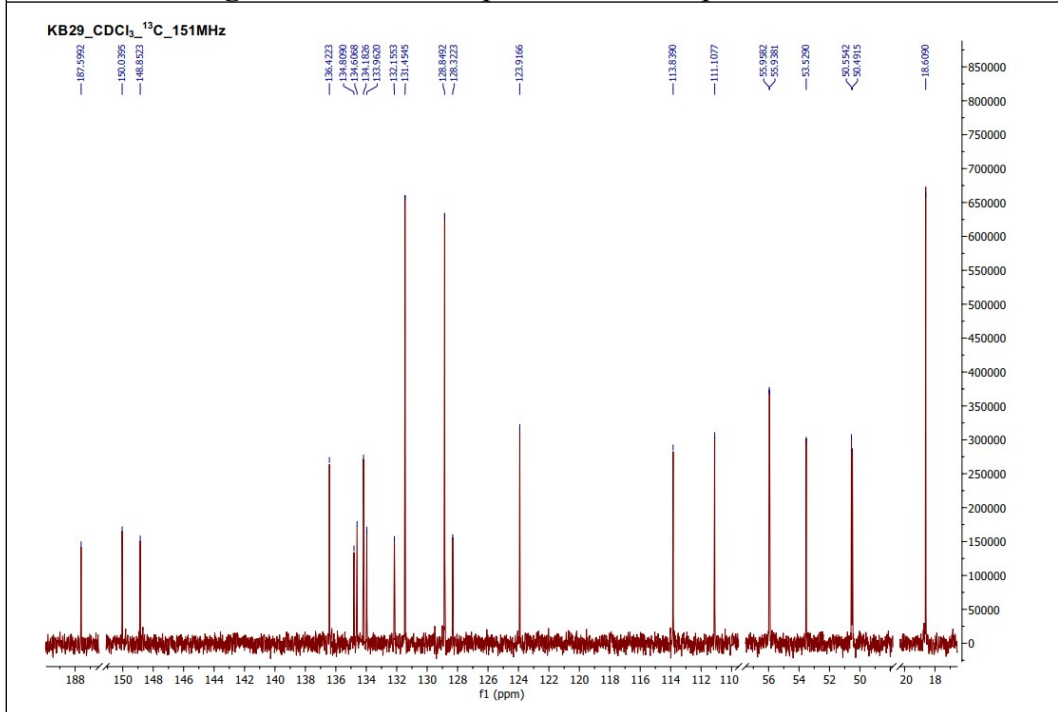

**Fig S30.** HR-MS spectrum of compound KB2a

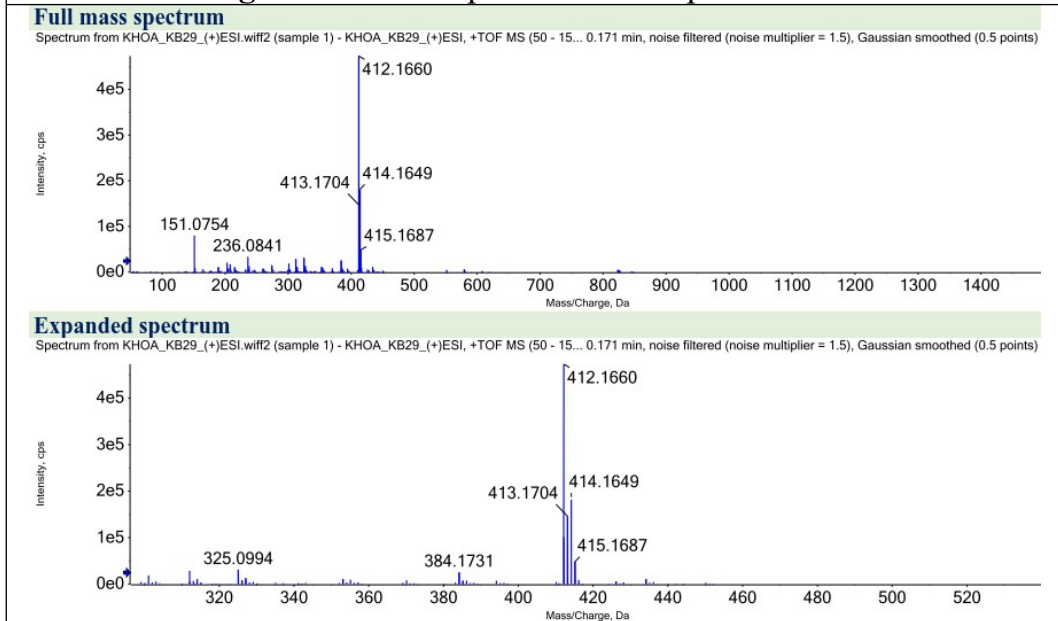

**Fig S31.**  $^1\text{H}$  NMR Spectrum of compound KB2b

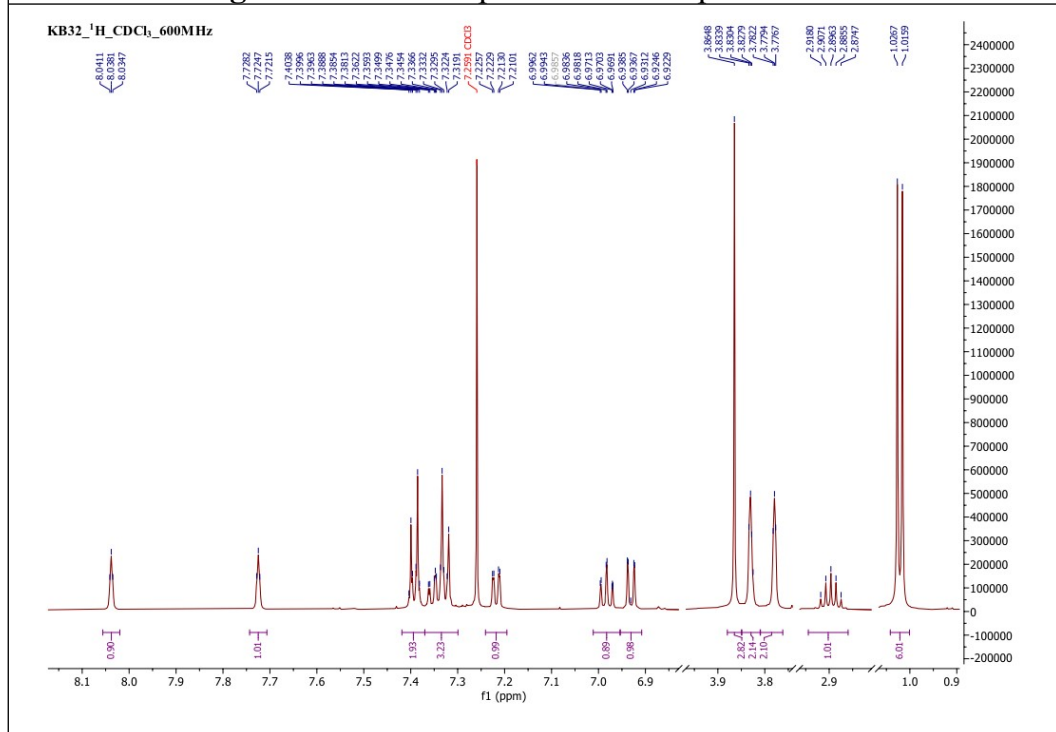

**Fig S32.**  $^{13}\text{C}$  NMR Spectrum of compound KB2b

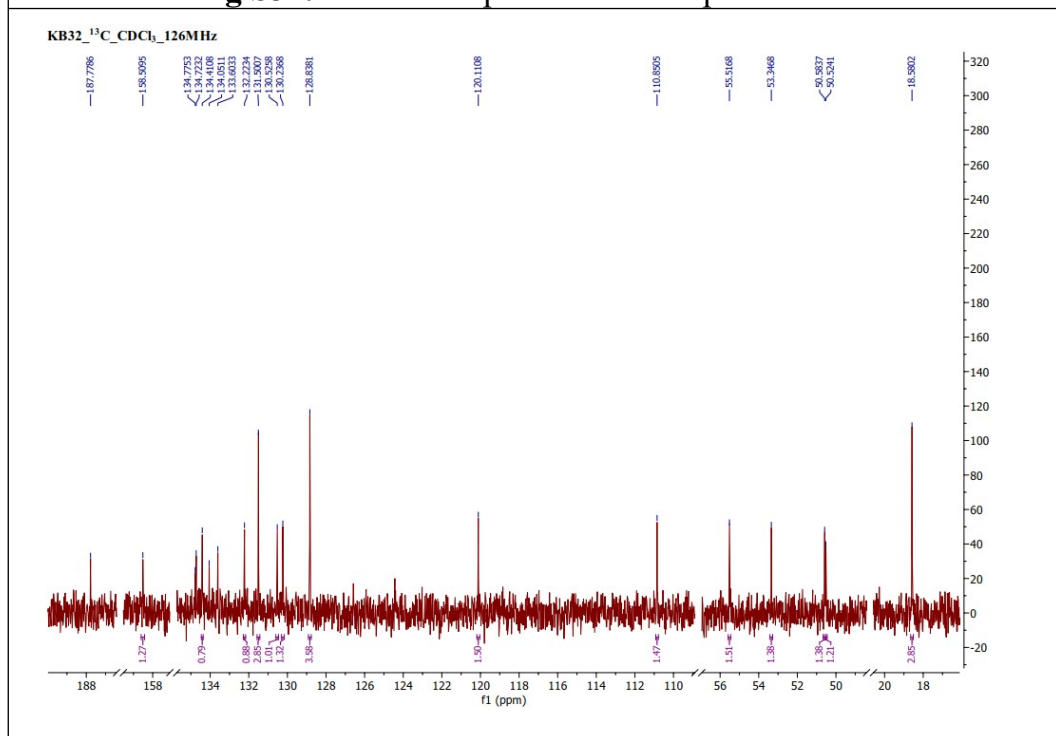

**Fig S33. HR-MS spectrum of compound KB2b**

**Full mass spectrum**

Spectrum from KHOA\_KB32\_(+)ESI.wiff2 (sample 1) - KHOA\_KB32\_(+)ESI, +TOF MS (50 - 15... 0.171 min, noise filtered (noise multiplier = 1.5), Gaussian smoothed (0.5 points))

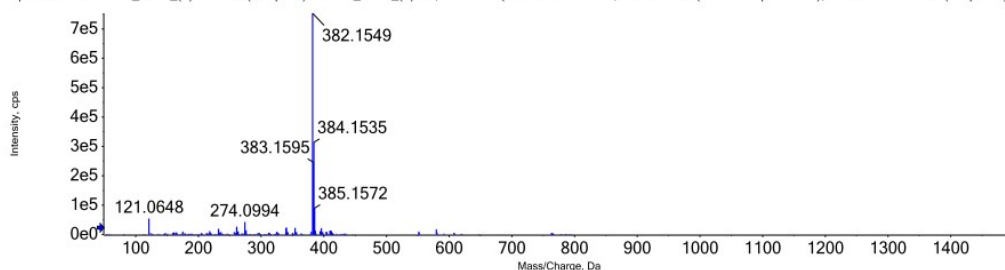

**Expanded spectrum**

Spectrum from KHOA\_KB32\_(+)ESI.wiff2 (sample 1) - KHOA\_KB32\_(+)ESI, +TOF MS (50 - 15... 0.171 min, noise filtered (noise multiplier = 1.5), Gaussian smoothed (0.5 points))

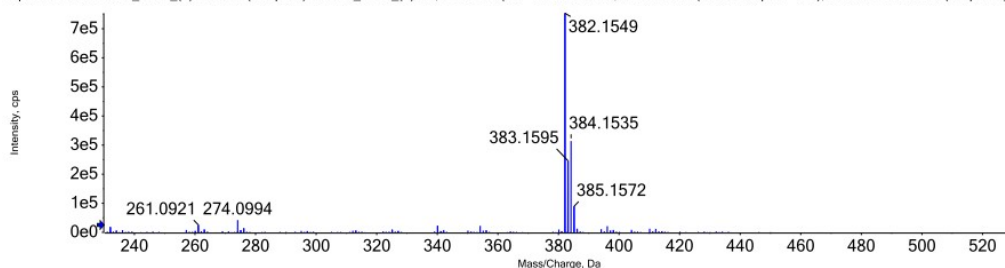

**Fig S34. <sup>1</sup>H NMR Spectrum of compound KB2c**

KB33\_1H\_CDCl3\_600MHz

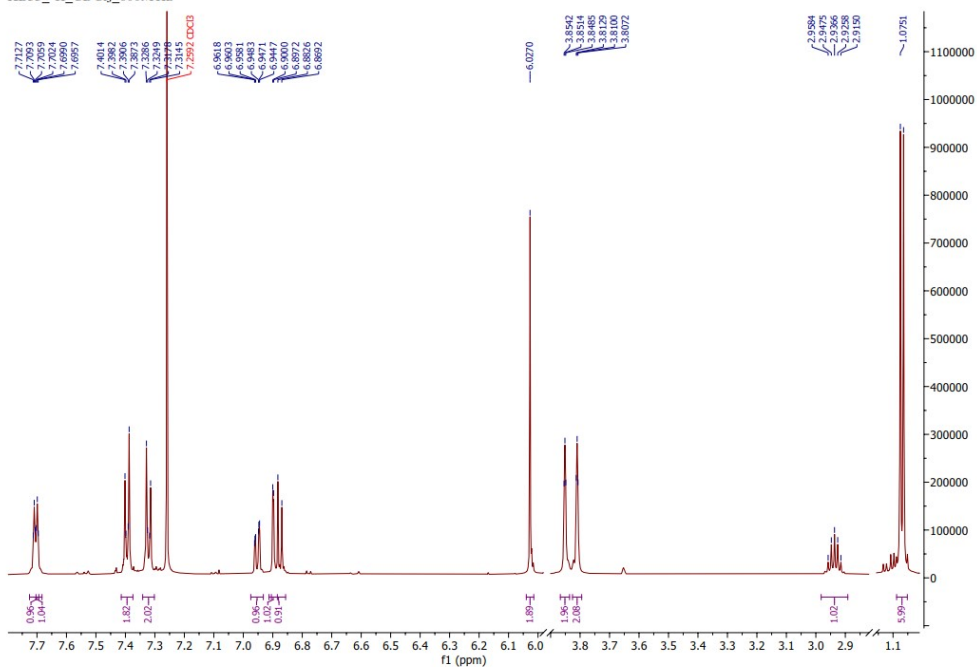

**Fig S35.**  $^{13}\text{C}$  NMR Spectrum of compound KB2c

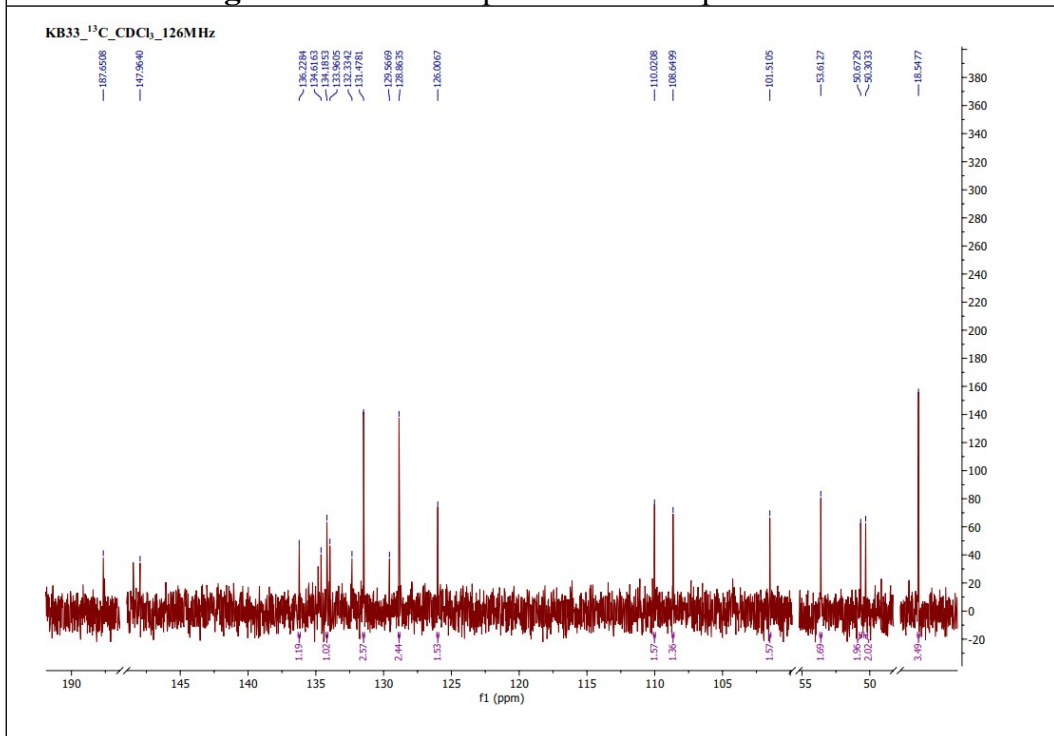

**Fig S36.** HR-MS spectrum of compound KB2c

**Full mass spectrum**

Spectrum from KHOA\_KB33\_(+)ESI.wiff2 (sample 1) - KHOA\_KB33\_(+)ESI, +TOF MS (50 - 15... 0.171 min, noise filtered (noise multiplier = 1.5), Gaussian smoothed (0.5 points))

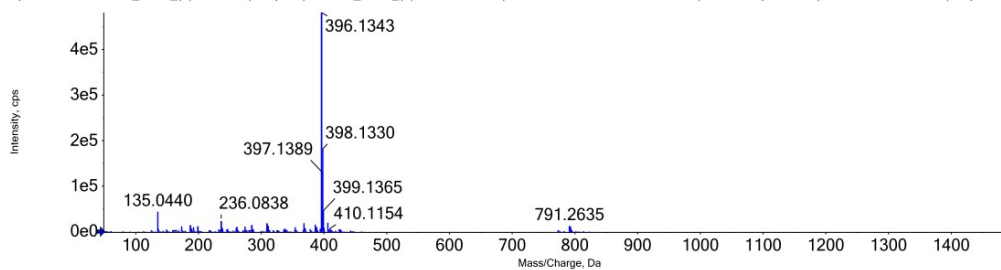

**Expanded spectrum**

Spectrum from KHOA\_KB33\_(+)ESI.wiff2 (sample 1) - KHOA\_KB33\_(+)ESI, +TOF MS (50 - 15... 0.171 min, noise filtered (noise multiplier = 1.5), Gaussian smoothed (0.5 points))

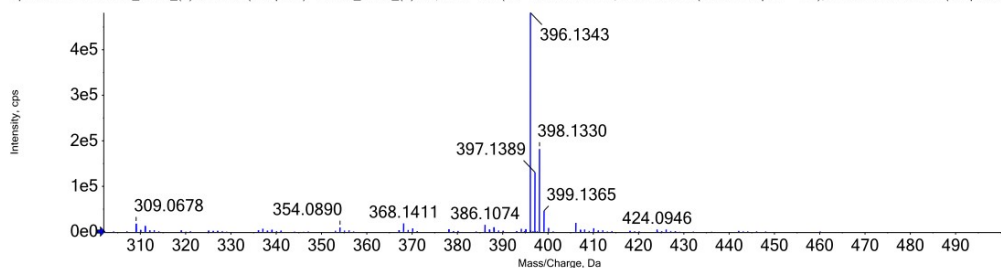

Fig S37. <sup>1</sup>H NMR Spectrum of compound KB2d

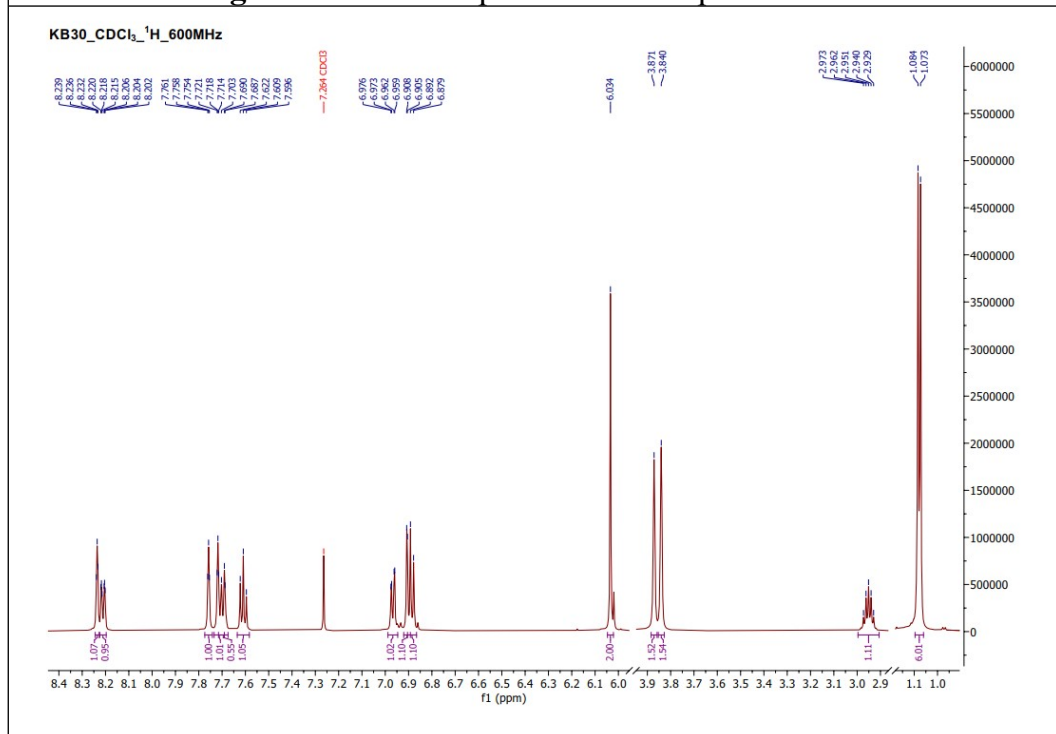

Fig S38. <sup>13</sup>C Spectrum of compound KB2d

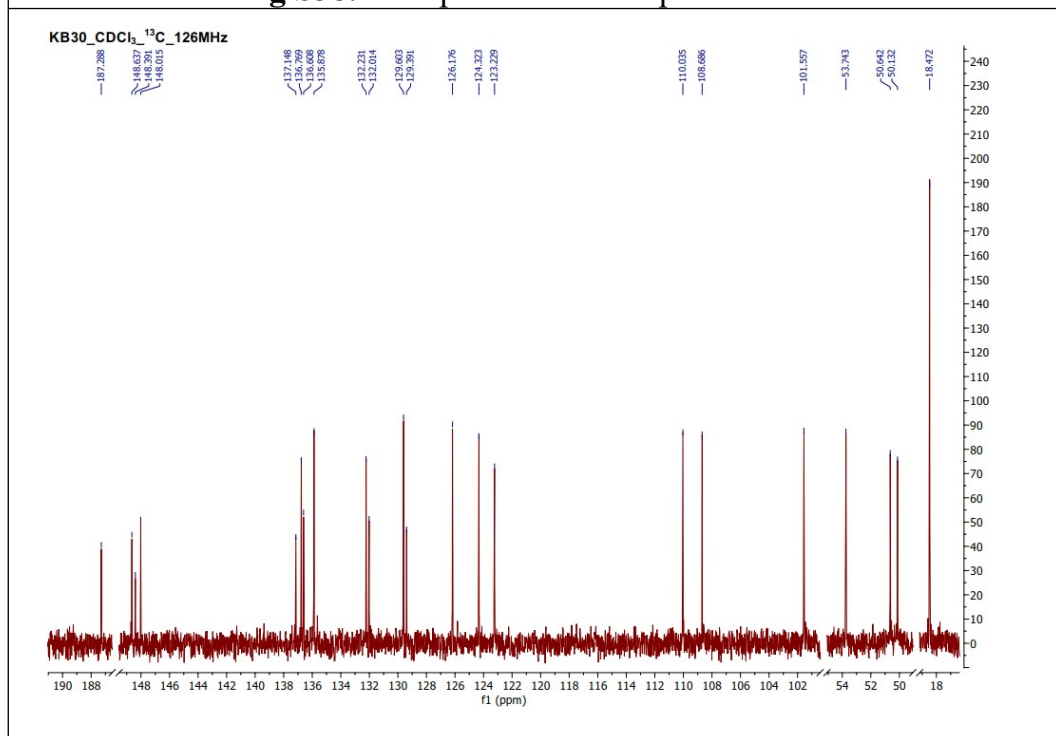

## Fig S39. HR-MS spectrum of compound KB2d

### Full mass spectrum

Spectrum from KHOA\_KB30\_(+)ESI.wiff2 (sample 1) - KHOA\_KB30\_(+)ESI, +TOF MS (50 - 15... 0.171 min, noise filtered (noise multiplier = 1.5), Gaussian smoothed (0.5 points))

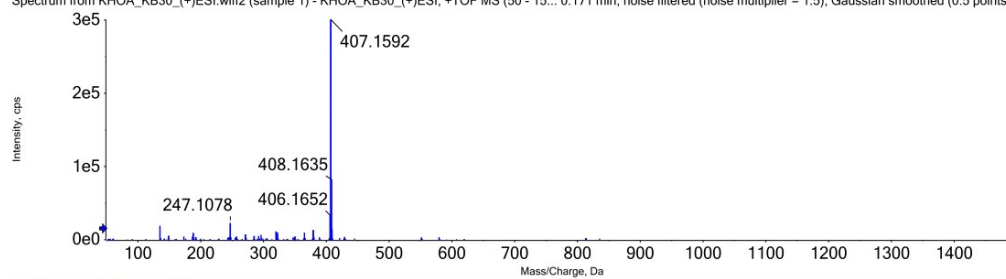

### Expanded spectrum

Spectrum from KHOA\_KB30\_(+)ESI.wiff2 (sample 1) - KHOA\_KB30\_(+)ESI, +TOF MS (50 - 15... 0.171 min, noise filtered (noise multiplier = 1.5), Gaussian smoothed (0.5 points))

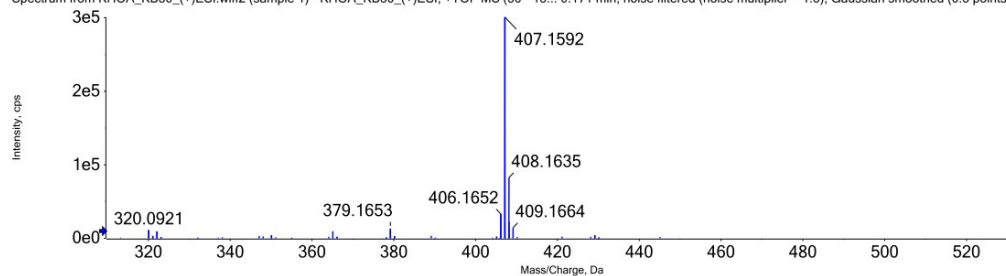

Supplement: d6ra02446g1.pdf [file d6ra02446g1.pdf]
